# Supplementary material for: Efficient Inorganic/Organic Acid Leaching for the Remediation of Protogenetic Lead-Contaminated Soil
Source: MDPI journal article supplement (doi:10.3390/app12083995), 2022-04-14
Supplement: s1 [file s1]

*Article*

# Efficient Inorganic/Organic Acid Leaching for the Remediation of Progenetic Lead-Contaminated Soil

Longheng Xiao <sup>1</sup>, Xiang Cheng <sup>1</sup>, Tianhua Zhang <sup>1,2</sup>, Min Guo <sup>1</sup> and Mei Zhang <sup>1,\*</sup>

<sup>1</sup> State Key Laboratory of Advanced Metallurgy, School of Metallurgical and Ecological Engineering, University of Science and Technology Beijing, Beijing 100083, China; d202110123@xs.ustb.edu.cn (L.X.); b20190100@xs.ustb.edu.cn (X.C.); zhangtianhua@cribc.com (T.Z.); guomin@ustb.edu.cn (M.G.)

<sup>2</sup> MCC Group, Central Research Institute of Building and Construction Co., Ltd., Beijing 100088, China

\* Correspondence: zhangmei@ustb.edu.cn; Tel./Fax: +86-10-6233-4926

**Table S1.** Orthogonal experiment design of HCl leaching.

| <b>Factor<br/>Level</b> | <b>Concentration<br/>(mol·L<sup>-1</sup>)</b> | <b>Solid-to-Liquid<br/>ratio (g·ml<sup>-1</sup>)</b> | <b>Stirring Time<br/>(h)</b> |
|-------------------------|-----------------------------------------------|------------------------------------------------------|------------------------------|
| 1                       | 0.05                                          | 1: 10                                                | 8h                           |
| 2                       | 0.1                                           | 1: 15                                                | 12h                          |
| 3                       | 0.2                                           | 1: 20                                                | 24h                          |
| 4                       | 0.5                                           | 1: 25                                                | 48h                          |

**Table S2.** Orthogonal experiment design of CA leaching.

| <div>Factor</div> <div>Level</div> | Concentration<br>(mol·L <sup>-1</sup> ) | Solid-to-Liquid<br>ratio (g·ml <sup>-1</sup> ) | Stirring Time<br>(h) |
|------------------------------------|-----------------------------------------|------------------------------------------------|----------------------|
| 1                                  | 0.03                                    | 1: 10                                          | 8h                   |
| 2                                  | 0.05                                    | 1: 15                                          | 12h                  |
| 3                                  | 0.07                                    | 1: 20                                          | 24h                  |
| 4                                  | 0.09                                    | 1: 25                                          | 48h                  |

**Table S3.** Orthogonal experiment results and analysis of HCl leaching.

| No.                       | Stirring Time<br>(h) | Concentration<br>(mol·L <sup>-1</sup> ) | Solid-to-Liquid<br>Ratio (g·ml <sup>-1</sup> ) | η (%) |
|---------------------------|----------------------|-----------------------------------------|------------------------------------------------|-------|
| 1                         | 8                    | 0.05                                    | 1:10                                           | 0.137 |
| 2                         | 8                    | 0.1                                     | 1:15                                           | 0.136 |
| 3                         | 8                    | 0.2                                     | 1:20                                           | 65.7  |
| 4                         | 8                    | 0.5                                     | 1:25                                           | 72.2  |
| 5                         | 12                   | 0.05                                    | 1:15                                           | 0.174 |
| 6                         | 12                   | 0.1                                     | 1:10                                           | 0.109 |
| 7                         | 12                   | 0.2                                     | 1:25                                           | 68.1  |
| 8                         | 12                   | 0.5                                     | 1:20                                           | 72.7  |
| 9                         | 24                   | 0.05                                    | 1:20                                           | 0.155 |
| 10                        | 24                   | 0.1                                     | 1:25                                           | 8.50  |
| 11                        | 24                   | 0.2                                     | 1:10                                           | 0.579 |
| 12                        | 24                   | 0.5                                     | 1:15                                           | 74.0  |
| 13                        | 48                   | 0.05                                    | 1:25                                           | 0.788 |
| 14                        | 48                   | 0.1                                     | 1:20                                           | 0.159 |
| 15                        | 48                   | 0.2                                     | 1:15                                           | 51.8  |
| 16                        | 48                   | 0.5                                     | 1:10                                           | 69.9  |
| <i>K</i> <sub>1</sub> (%) | 138                  | 1.26                                    | 70.7                                           | -     |
| <i>K</i> <sub>2</sub> (%) | 141                  | 8.91                                    | 126                                            | -     |
| <i>K</i> <sub>3</sub> (%) | 83.2                 | 186                                     | 139                                            | -     |
| <i>K</i> <sub>4</sub> (%) | 123                  | 289                                     | 150                                            | -     |
| <i>k</i> <sub>1</sub> (%) | 34.5                 | 0.314                                   | 17.7                                           | -     |
| <i>k</i> <sub>2</sub> (%) | 35.3                 | 2.23                                    | 31.5                                           | -     |
| <i>k</i> <sub>3</sub> (%) | 20.8                 | 46.6                                    | 34.7                                           | -     |
| <i>k</i> <sub>4</sub> (%) | 30.7                 | 72.2                                    | 37.5                                           | -     |
| <i>R</i> (%)              | 14.5                 | 71.9                                    | 19.8                                           | -     |

*K* values (*K*<sub>1</sub>, *K*<sub>2</sub>, *K*<sub>3</sub>, *K*<sub>4</sub>) were the sum of the results of each level and represented different levels of each factor between the minimum and the maximum in the orthogonal experiments; *k*<sub>*i*</sub> is the average of *K*<sub>*i*</sub>.

**Table S4.** Orthogonal experiment results and analysis of CA leaching.

| No.                   | Stirring Time<br>(h) | Concentration<br>(mol·L <sup>-1</sup> ) | Solid-to-Liquid<br>Ratio | η (%) |
|-----------------------|----------------------|-----------------------------------------|--------------------------|-------|
| 1                     | 8                    | 0.01                                    | 1:10                     | 0.79  |
| 2                     | 8                    | 0.05                                    | 1:15                     | 6.65  |
| 3                     | 8                    | 0.1                                     | 1:20                     | 61.81 |
| 4                     | 8                    | 0.2                                     | 1:25                     | 63.51 |
| 5                     | 12                   | 0.01                                    | 1:15                     | 0.89  |
| 6                     | 12                   | 0.05                                    | 1:10                     | 4.63  |
| 7                     | 12                   | 0.1                                     | 1:25                     | 63.40 |
| 8                     | 12                   | 0.2                                     | 1:20                     | 60.97 |
| 9                     | 24                   | 0.01                                    | 1:20                     | 0.95  |
| 10                    | 24                   | 0.05                                    | 1:25                     | 61.48 |
| 11                    | 24                   | 0.1                                     | 1:10                     | 8.79  |
| 12                    | 24                   | 0.2                                     | 1:15                     | 61.46 |
| 13                    | 48                   | 0.01                                    | 1:25                     | 0.63  |
| 14                    | 48                   | 0.05                                    | 1:20                     | 5.40  |
| 15                    | 48                   | 0.1                                     | 1:15                     | 26.54 |
| 16                    | 48                   | 0.2                                     | 1:10                     | 18.91 |
| <i>K</i> <sub>1</sub> | 132.75               | 3.26                                    | 33.12                    | -     |
| <i>K</i> <sub>2</sub> | 129.89               | 78.16                                   | 95.54                    | -     |
| <i>K</i> <sub>3</sub> | 132.68               | 160.53                                  | 129.12                   | -     |
| <i>K</i> <sub>4</sub> | 51.48                | 204.85                                  | 189.02                   | -     |
| <i>k</i> <sub>1</sub> | 33.19                | 0.81                                    | 8.28                     | -     |
| <i>k</i> <sub>2</sub> | 32.47                | 19.54                                   | 23.89                    | -     |
| <i>k</i> <sub>3</sub> | 33.17                | 40.13                                   | 32.28                    | -     |
| <i>k</i> <sub>4</sub> | 12.87                | 51.21                                   | 47.25                    | -     |
| R                     | 20.32                | 50.4                                    | 38.97                    | -     |
